# Supplementary material for: Hepatitis B virus core protein phosphorylation: Identification of the SRPK1 target sites and impact of their occupancy on RNA binding and capsid structure
Source: PubMed Central journal article supplement (PMC6317823; doi:10.1371/journal.ppat.1007488), 2018-12-19
Supplement: ppat.1007488.s007.pdf [file ppat.1007488.s007.pdf]

**A****HBc183 - SRPK1**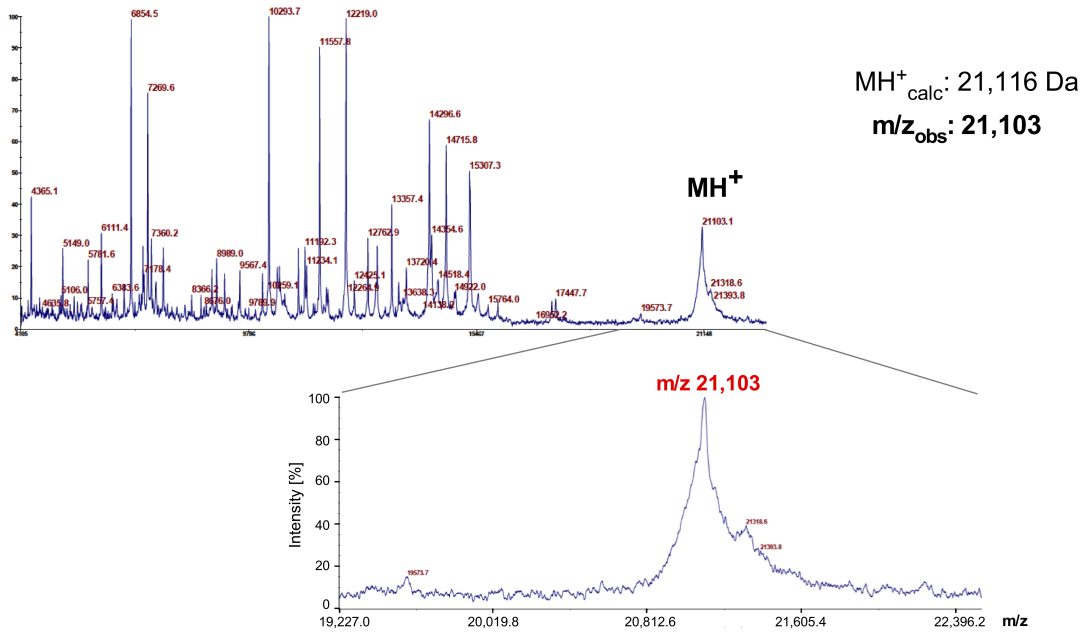**B****HBc183 + SRPK1**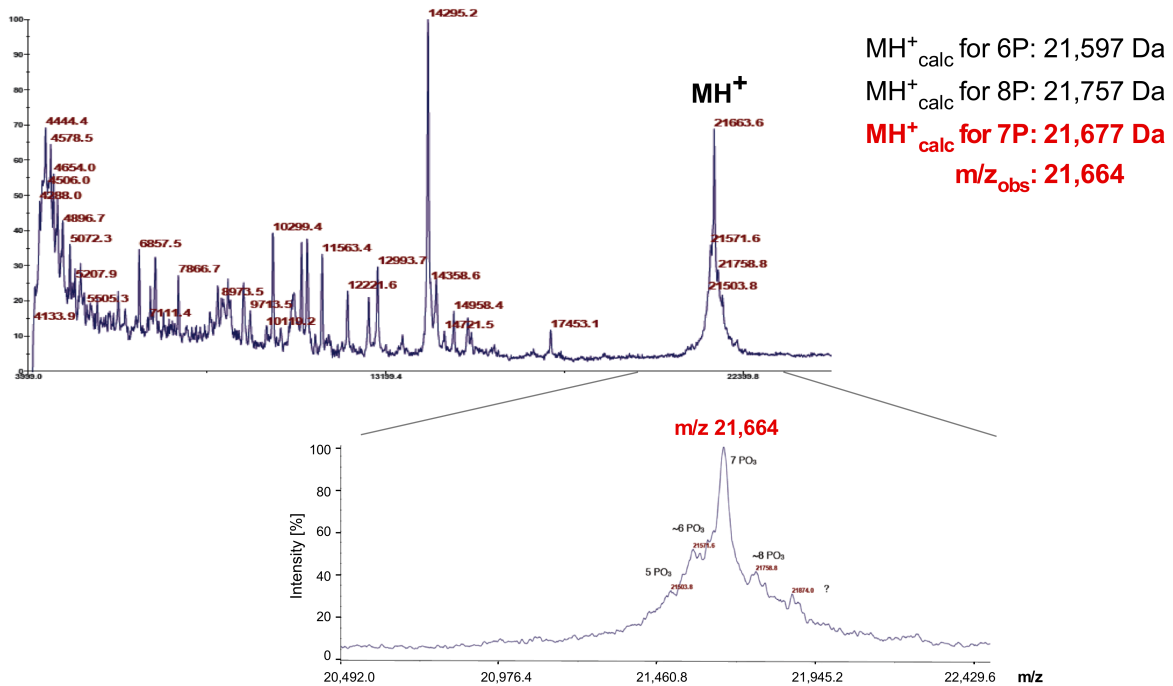

**S5 Fig. MALDI-TOF MS characterization of HBc183 expressed in the absence vs. presence of SRPK1 $\Delta$ NS1.** Analyses were performed by Frederic Delolme (UMR5086 CNRS - Université Lyon 1, France) on a Sciex Voyager DE-PRO MALDI-TOF instrument, using saturated sinapic acid as matrix at a sample:matrix dilution of 1:100 (v/v). **(A) HBc183 expressed in the absence of SRPK1.** The observed  $m/z$  21,103 for the dominant  $MH^+$  peak fits best to the calculated  $MH^+$  mass of 21,116 Da for unmodified HBc183 (including the N terminal Met). **(B) HBc183 expressed in the presence of SRPK1.** The observed  $m/z$  21,664 for the dominant  $MH^+$  peak fits best to the calculated  $MH^+$  mass of 21,676 Da for HBc183 carrying 7 phosphoryl groups. While peak intensity is not directly correlated with abundance a rather homogeneous seven-fold phosphorylation status is supported by the uniform appearance of the HBc183 + SRPK1 protein in Phos-Tag SDS-PAGE (Fig 3) and the equal dominance of a seven-fold phosphorylated peptide representing just the CTD (Fig 4).
