# Supplementary material for: Hepatitis B virus core protein phosphorylation: Identification of the SRPK1 target sites and impact of their occupancy on RNA binding and capsid structure
Source: PubMed Central journal article supplement (PMC6317823; doi:10.1371/journal.ppat.1007488), 2018-12-19
Supplement: ppat.1007488.s009.pdf [file ppat.1007488.s009.pdf]

### HBc183 wt and non-S/T>A CTD mutants, +/- different kinases

| Assembly domain | *140     | *150    | *160   | *170     | *180    | dominant m/z <sub>obs</sub> | MH <sup>+</sup> fits # P | M <sub>calc</sub> [Da] |     |        |
|-----------------|----------|---------|--------|----------|---------|-----------------------------|--------------------------|------------------------|-----|--------|
| wt              | LSTLPETT | VRRRRGR | SPRRRT | TPSPRRRR | QSPRRRR | QSPRE                       | QC <sub>183</sub>        | 21,103                 | 0 P | 21,116 |
| wt + SRPK1      |          |         |        |          |         |                             |                          | 21,664                 | 7 P | 21,676 |
| 140             |          |         |        |          |         |                             |                          | 15,910                 | 0 P | 15,917 |
| 140 + SRPK1     |          |         |        |          |         |                             |                          | 15,918                 | 0 P | 15,917 |
| 149             |          |         |        |          |         |                             |                          | 16,841                 | 0 P | 16,844 |
| 149 + SRPK1     |          |         |        |          |         |                             |                          | 16,847                 | 0 P | 16,844 |
| C183A           |          |         |        |          |         |                             |                          | 21,084                 | 0 P | 21,082 |
| C183A + SRPK1   |          |         |        |          |         |                             |                          | 21,644                 | 7 P | 21,656 |
| wt + PKA cd     |          |         |        |          |         |                             |                          | 21,361                 | 3 P | 21,356 |
| wt + PKC cd     |          |         |        |          |         |                             |                          | 21,353                 | 3 P | 21,356 |

### HBc183 CTD S/T>A mutants, all + SRPK1

|                   |  |   |   |   |   |   |   |        |     |        |
|-------------------|--|---|---|---|---|---|---|--------|-----|--------|
| S155A             |  | A |   |   |   |   |   | 21,585 | 6 P | 21,580 |
| T160A             |  |   | A |   |   |   |   | 21,566 | 6 P | 21,561 |
| S162A             |  |   |   | A |   |   |   | 21,579 | 6 P | 21,580 |
| S168A             |  |   |   |   | A |   |   | 21,572 | 6 P | 21,580 |
| S170A             |  |   |   |   |   | A |   | 21,576 | 6 P | 21,580 |
| S176A             |  |   |   |   |   |   | A | 21,577 | 6 P | 21,580 |
| S178A             |  |   |   |   |   |   |   | 21,574 | 6 P | 21,580 |
| S181A             |  |   |   |   |   |   |   | 21,659 | 7 P | 21,660 |
| S155A_T160A       |  | A | A |   |   |   |   | 21,465 | 5 P | 21,470 |
| S155A_S162A       |  | A | A |   |   |   |   | 21,485 | 5 P | 21,484 |
| S162A_S168A       |  |   | A | A |   |   |   | 21,483 | 5 P | 21,484 |
| S162R_S168A       |  |   | R | A |   |   |   | 21,569 | 5 P | 21,569 |
| S162A_S168G       |  |   | A |   | G |   |   | 21,467 | 5 P | 21,470 |
| S176A_S178A       |  |   |   |   |   | A | A | 21,484 | 5 P | 21,484 |
| S176A_S181A       |  |   |   |   |   | A | A | 21,560 | 6 P | 21,564 |
| S155A_T160A_S162A |  | A | A | A |   |   |   | 21,387 | 4 P | 21,388 |
| T162A_S168G_S170A |  |   | A |   | G | A |   | 21,367 | 4 P | 21,374 |
| S176A_S178A_S181A |  |   |   |   |   | A | A | 21,464 | 5 P | 21,468 |

**S7 Fig. Predominant number of phosphoryl groups in kinase coexpressed wild-type HBc183 and CTD derivatives by MALDI-TOF MS analysis.** The top line shows the C terminal HBc sequence starting at position 140. In the upper block coexpression with a specific kinase is indicated; proteins in the lower block are all HBc183 S/T>A variants coexpressed with SRPK1ΔNS1. Dots indicate identical amino acids. The column “dominant m/z<sub>obs</sub>” indicates the major observed m/z peak, the next column shows the number of phosphoryl groups giving the closest match to the respective calculated MH<sup>+</sup> mass in Da given in the last column; consider that one phosphoryl group adds ~80 Da. HBc140 and HBc149 coexpressed with SRPK1 showed the same masses as the mono-expressed proteins, indicating a lack of target sites in the assembly domain and the linker. Coexpression with the catalytic domains of PKA and PKC introduced predominantly three phosphoryl groups into the CLP forming wild-type HBc183 protein; for the non-assembling GFP-TEV-CTD fusion protein four- and five-fold phosphorylated species were most abundant (S6 Fig); this may reflect better target site accessibility. For SRPK1, each S/T>A mutation except S181A caused the loss of one phosphoryl group.
